# Supplementary material for: O-GlcNAcylation ameliorates the pathological manifestations of Alzheimer’s disease by inhibiting necroptosis
Source: PubMed Central journal article supplement — Sci Adv. 2021 Jan 13;7(3):eabd3207. doi: 10.1126/sciadv.abd3207 (PMC7806231; doi:10.1126/sciadv.abd3207), 2021-01-13
Supplement: supp_7_3_eabd3207__1.pdf [file supp_7_3_eabd3207__1.pdf]

## Supplementary Materials for

### ***O*-GlcNAcylation ameliorates the pathological manifestations of Alzheimer's disease by inhibiting necroptosis**

Jinsu Park, Hee-Jin Ha, Eun Seon Chung, Seung Hyun Baek, Yoonsuk Cho, Hark Kyun Kim, Jihoon Han, Jae Hoon Sul, Jeongmi Lee, Eunae Kim, Junsik Kim, Yong Ryoul Yang, Mikyoung Park, Sung Hyun Kim, Thiruma V. Arumugam, Hyemin Jang, Sang Won Seo, Pann-Ghill Suh, Dong-Gyu Jo\*

\*Corresponding author. Email: jodg@skku.edu

Published 13 January 2021, *Sci. Adv.* 7, eabd3207 (2021)  
DOI: 10.1126/sciadv.abd3207

#### **This PDF file includes:**

Figs. S1 to S7  
Tables S1 to S3  
References

# Supplementary Materials

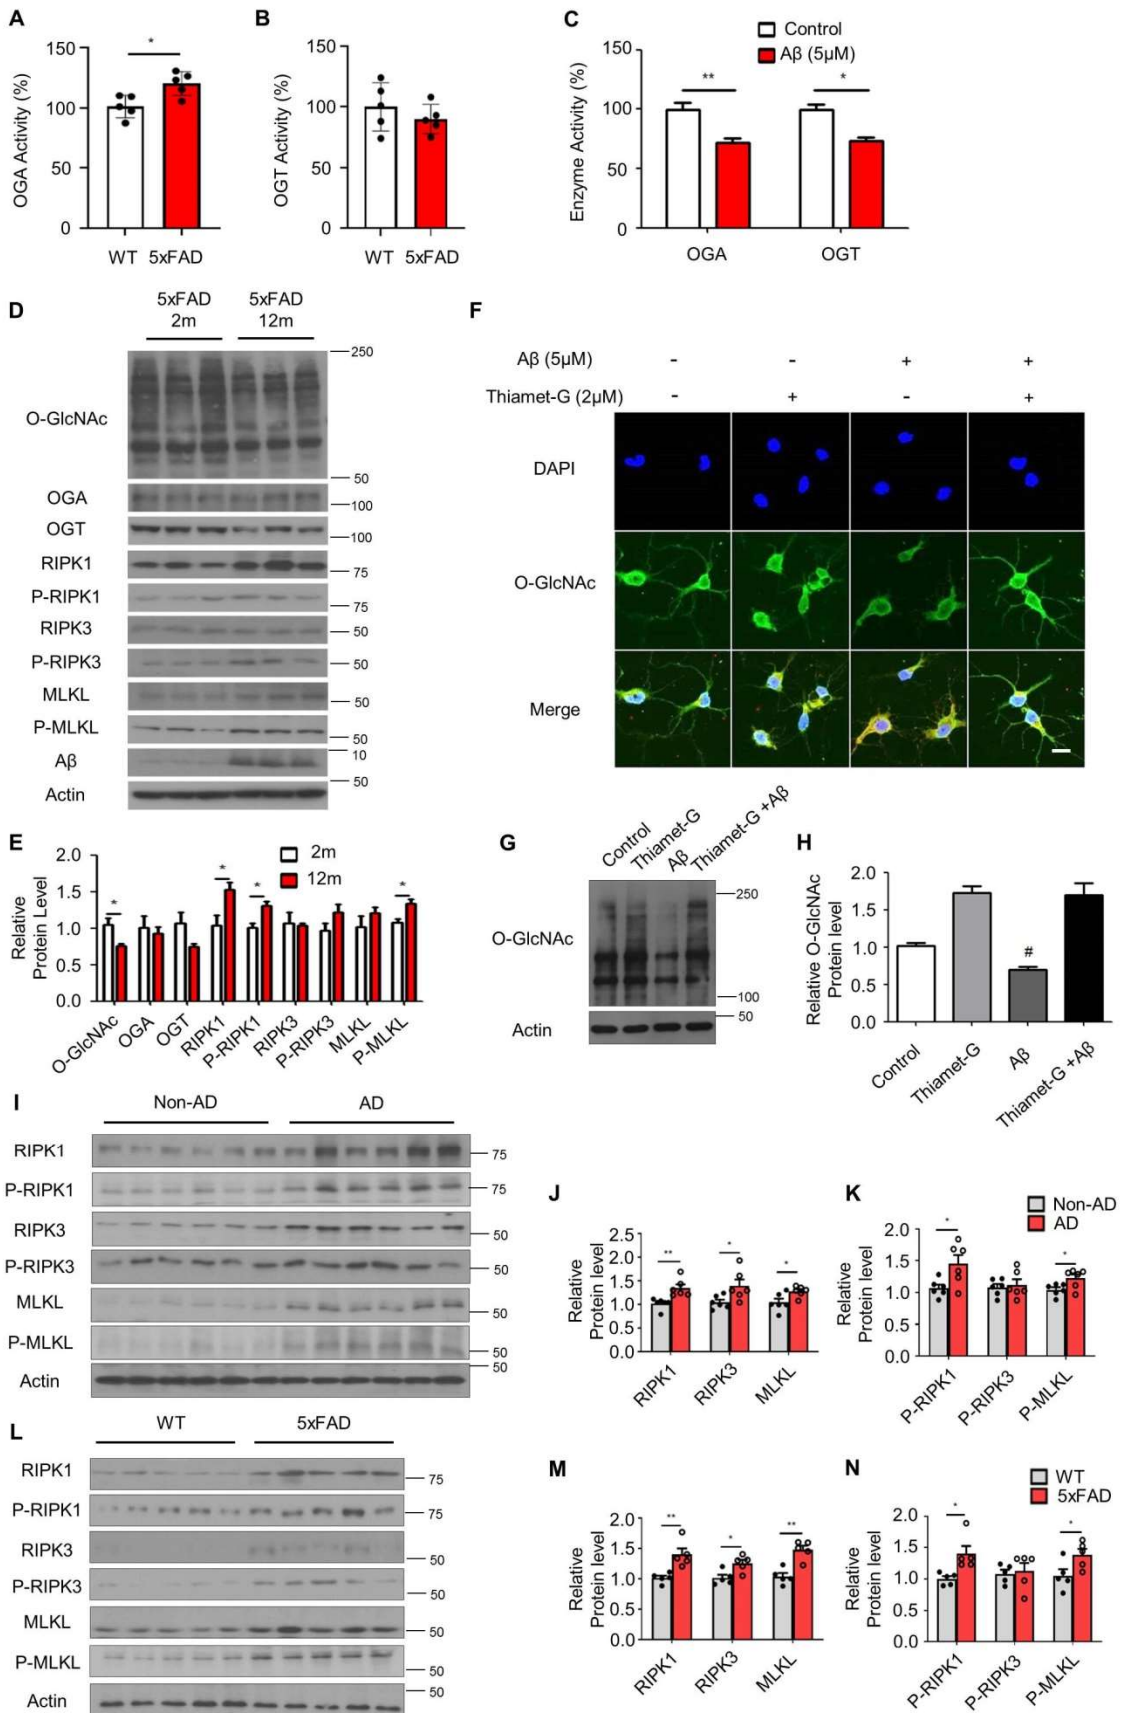

**Fig. S1. O-GlcNAc levels are decreased and necroptosis factors were increased in the brain of AD patients and 5xFAD mice.** (A and B) OGA (A) and OGT (B) activities in WT mice and 5xFAD mice (n = 5; 12 months of age). (C) OGA and OGT activities in rat primary neuron with exposure of A $\beta$  (n = 4). (D) Western blot analysis of O-GlcNAcylation and necroptosis related proteins in brain tissues of 5xFAD at 2 and 12 months old (n = 3). (E) Quantification of proteins in fig. S1D. (F) O-GlcNAc immunostaining in neurons with treating A $\beta$  or thiamet-G; scale bar = 10  $\mu$ m. (G) Western blot analysis of changes in the O-GlcNAcylation of cellular proteins by A $\beta$  and thiamet-G. (H) Quantification of O-GlcNAc proteins in fig. S1G (n = 3). (I) Western blot analysis of necroptosis proteins in insoluble pellet in brain tissues of AD patients (n = 6) and controls without symptoms of dementia (non-AD; n = 6) (J and K) Quantification of necroptosis proteins (J) and phosphorylated necroptosis proteins (K) in fig. S1I. (L) Western blot analysis of necroptosis proteins in insoluble fractions of brain tissues of 5xFAD and WT mice (n = 5) (M and N) Quantification of necroptosis proteins (M) and phosphorylated necroptosis proteins (N) in fig. S1L. The levels of phosphorylated necroptosis-related proteins were normalized to the levels of the corresponding total proteins. Values are presented as means  $\pm$  SEM. \*P < 0.05 and \*\*P < 0.01 versus non-AD (J and K) or WT (A, B, M and N) or 5xFAD 2m (E) or control (C); #P < 0.05 versus control (H); two-tailed Student's t test.

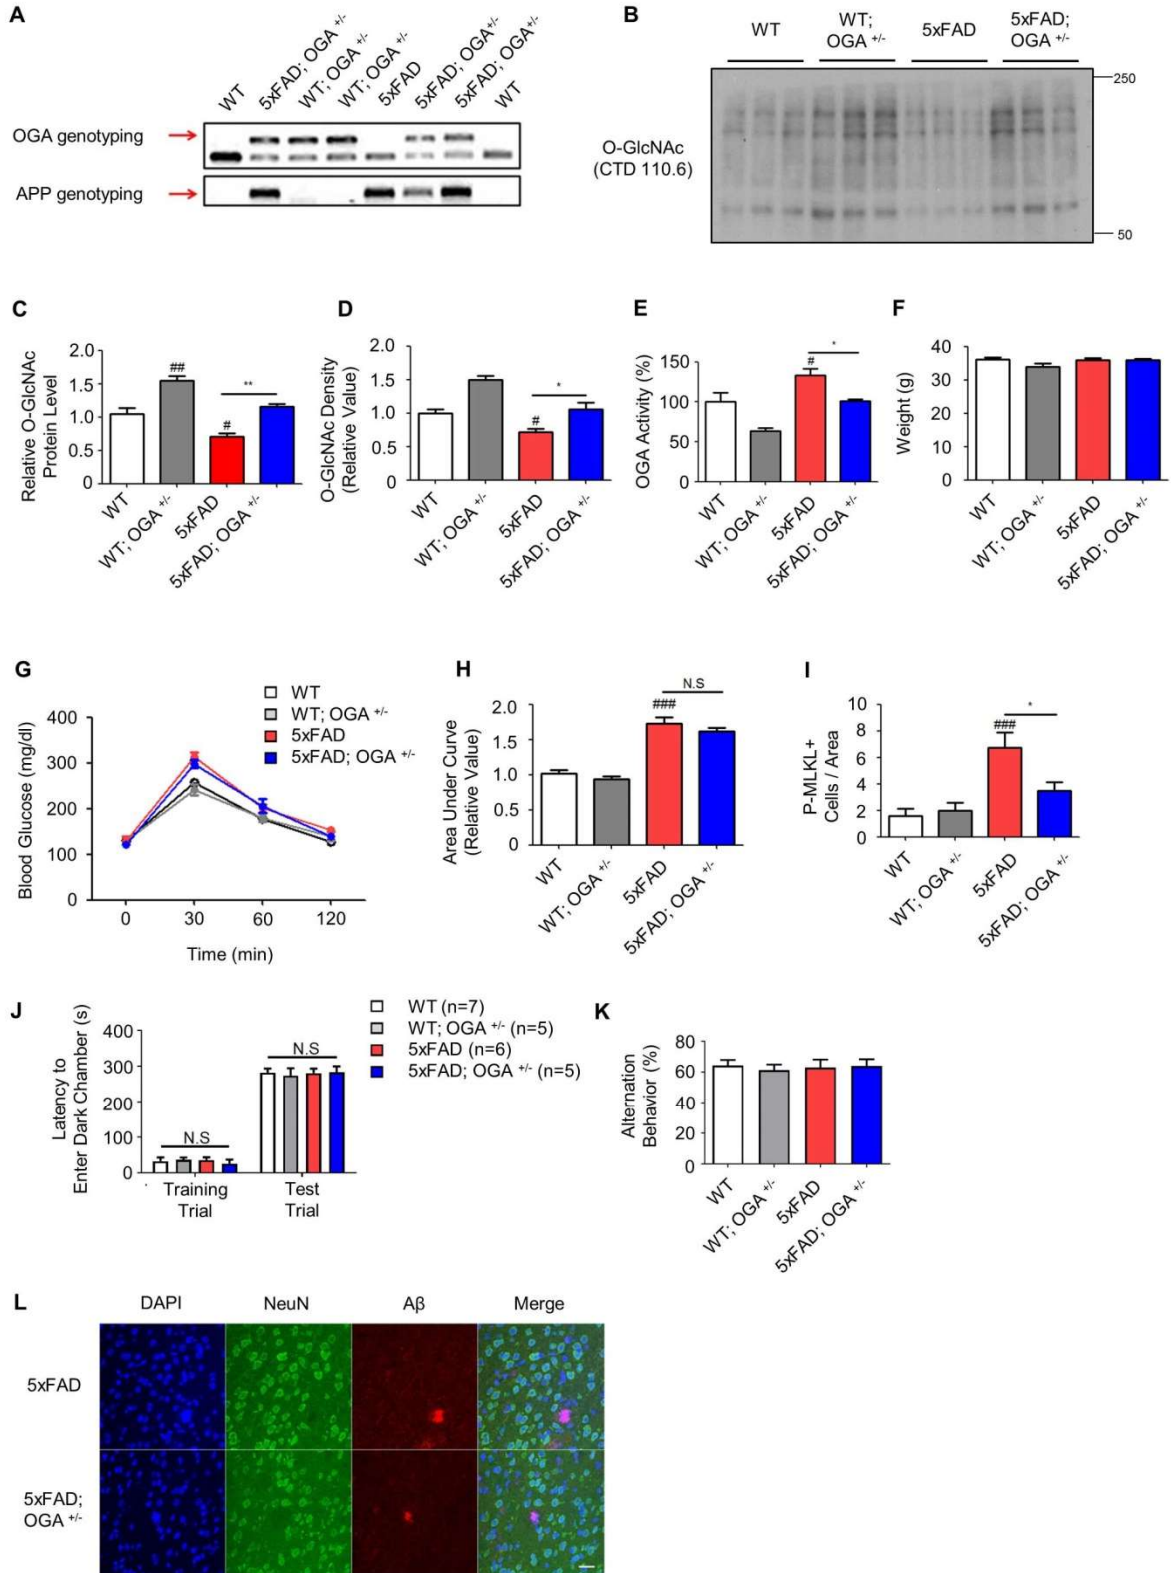

**Fig. S2. Experimental animals at 3 months did not show any AD symptoms.** (A) Representative result of genotyping of the four types of mice; WT, WT;OGA<sup>+/-</sup>, 5xFAD, and 5xFAD;OGA<sup>+/-</sup>. (B) Western blot analysis of O-GlcNAcylated proteins using CTD 110.6 antibody in brain samples of indicated mouse genotypes (n = 3). (C) Quantification of O-GlcNAc protein level in fig. S2B. (D) Quantification of O-GlcNAc area in Fig. 2D. (E) Quantification of OGA activity in indicated genotypes of mice (n = 3 to 4 per groups). (F) The weight of indicated mouse genotypes used in behavioral tests. (G) Blood glucose during oral glucose tolerance test of indicated mouse genotypes at 16 weeks of age (n = 4). (H) Area under curve of fig. S2G. (I) The number of P-MLKL positive cells in Fig. 2D. (J) Time of memory retention in the passive avoidance test of indicated mouse genotypes; WT, WT;OGA<sup>+/-</sup>, 5xFAD, and 5xFAD;OGA<sup>+/-</sup> at 3 months (n = 5 to 7). (K) The spontaneous alteration in Y-maze of indicated mouse genotypes at 3 months. (L) Immunostaining of NeuN and A $\beta$  in the brain tissues of 5xFAD and 5xFAD; OGA<sup>+/-</sup> mice at 3 months; scale bar = 20  $\mu$ m. Three slices of each sample were used to normalize each sample. Values are presented as means  $\pm$  SEM. #P < 0.05, and ###P < 0.001 versus WT; \*P < 0.05 versus 5xFAD; one-way ANOVA with Tukey's test. N.S: nonsignificant .

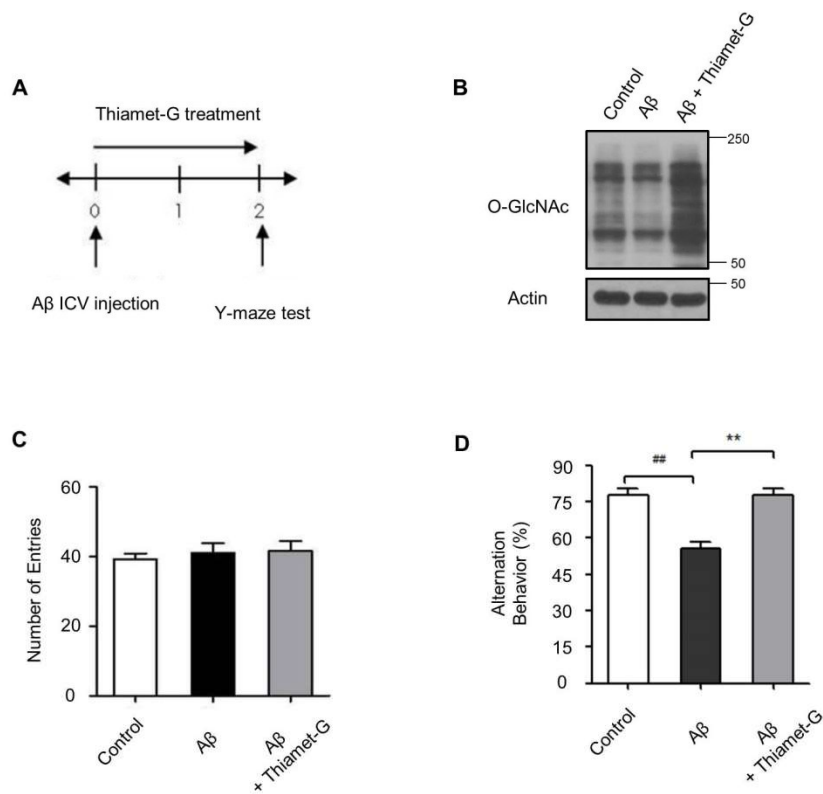

**Fig. S3. OGA inhibitor rescued cognitive function in the A $\beta$ -injected mice.** (A) A schematic diagram of A $\beta$ , drug treatment, and cognitive testing. (B) Western blot analysis of O-GlcNAc in brain samples of experimental mice (n = 3). (C) Analysis of the number of arm entries of experimental mice in the Y maze test (n = 6). (D) The evaluation of spontaneous alternation levels of each group in the Y maze test. Values are presented as means  $\pm$  SEM. ###P < 0.01 versus Control; \*\*P < 0.01 versus A $\beta$  injected group; one-way ANOVA with Tukey's test.

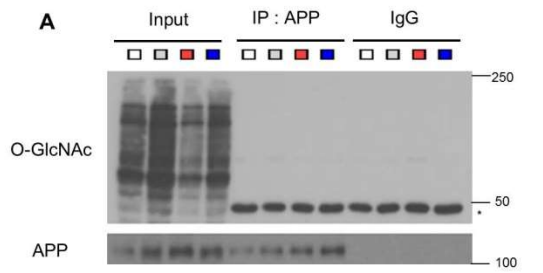

□ WT  
 □ WT; OGA <sup>+/-</sup>  
 □ 5xFAD  
 □ 5xFAD; OGA <sup>+/-</sup>

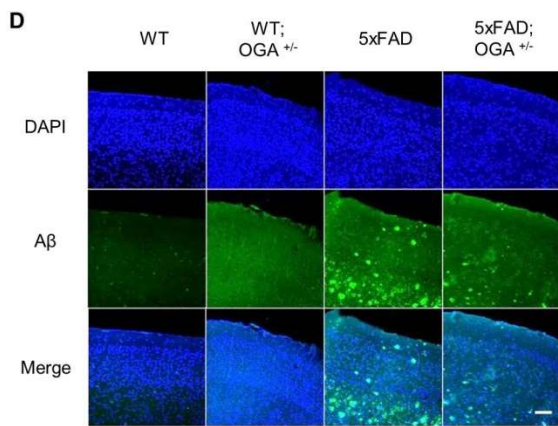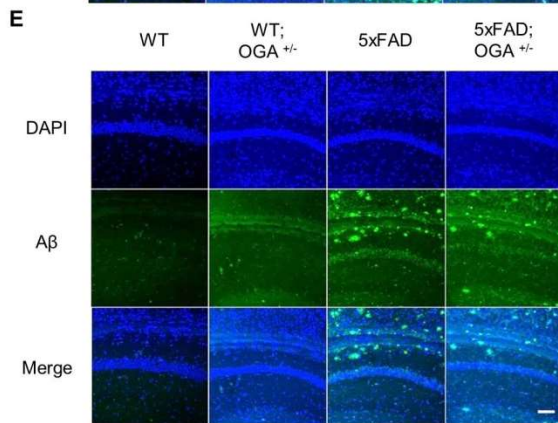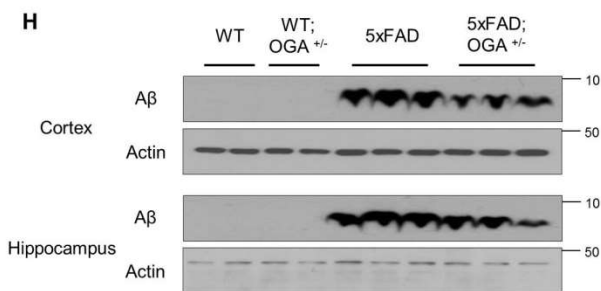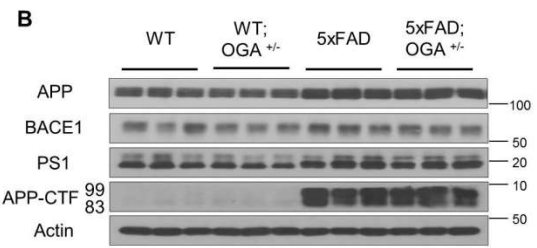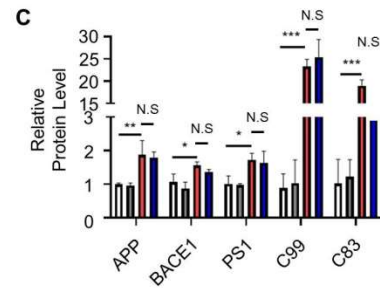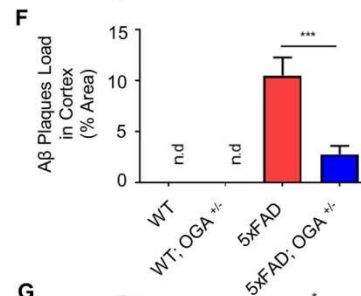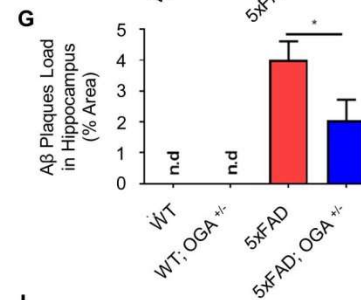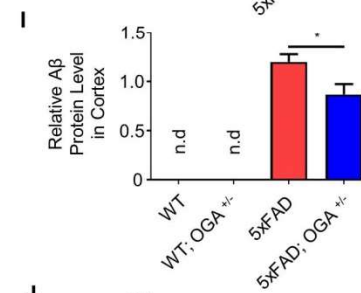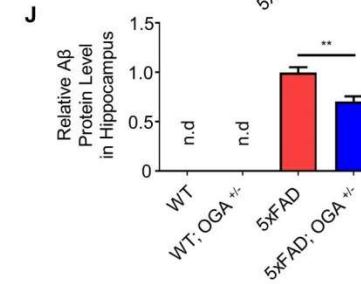

**Fig. S4. OGA haploinsufficiency did not affect the levels of proteins involved in amyloidogenesis in the brain tissue of 5xFAD mice, but decreased the A $\beta$  burden in the brain tissue of 5xFAD mice.** (A) Western blot analysis of O-GlcNAc proteins in APP immunoprecipitates from mice brain samples. The precipitated IgG heavy chain is marked with an asterisk. (B) Western blot analysis of expression of proteins related to APP processing in brain samples of indicated mouse genotypes (n = 3; 9 months of age). (C) Quantification of the expression of proteins related to APP processing in brain samples of 5xFAD mice and 5xFAD;OGA <sup>+/-</sup>. (D and E) A $\beta$  plaques in cortex (D) and hippocampus (E) of mice samples; scale bar = 100 $\mu$ m. (F and G) Quantification of A $\beta$  plaques loads in cortex (F) and hippocampus (G) (n = 3 to 5). (H) Western blot analysis of A $\beta$  expression in the cortex and hippocampus of indicated mouse genotypes (n = 3). (I and J) Quantification of A $\beta$  expression in the cortex (I) and hippocampus (J) of indicated mouse genotypes. Three slices of each sample were used to normalize each sample. Values are presented as means  $\pm$  SEM. \*P < 0.05, \*\*P < 0.01, \*\*\*P < 0.001 versus 5xFAD; one-way ANOVA with Tukey's test. N.S., nonsignificant; n.d., not detectable.



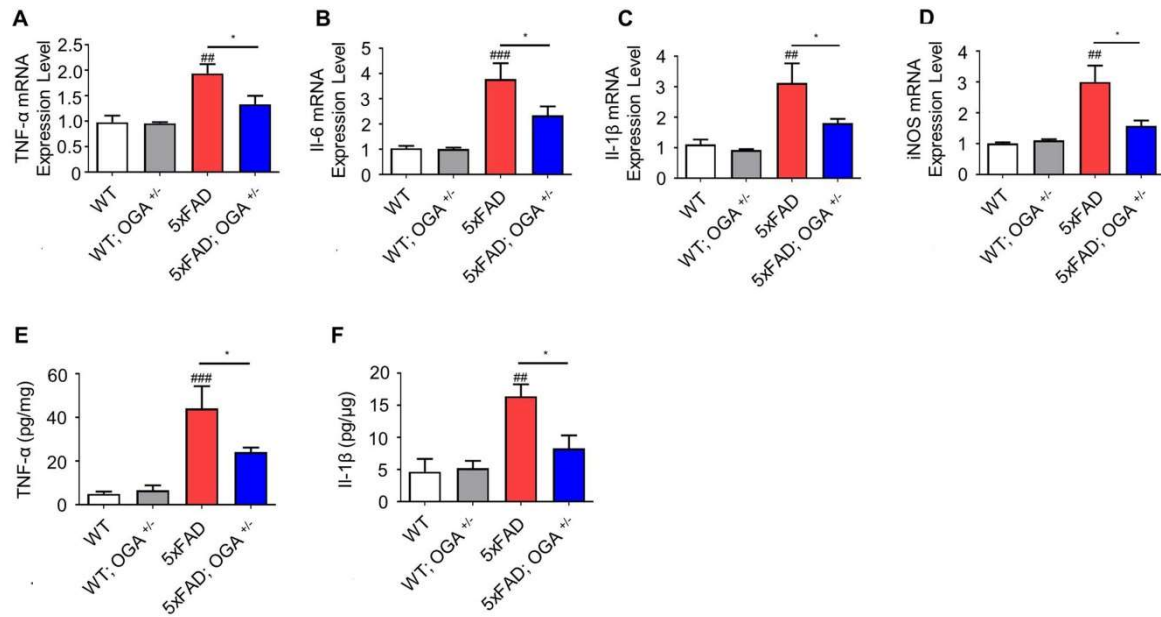

**Fig. S5. Increasing O-GlcNAcylation alleviates neuroinflammatory responses.** (A to D) mRNA levels of TNF- $\alpha$  (A), Il-6 (B), Il-1 $\beta$  (C), and iNOS (D) in mice brain samples (n = 4 to 6). (E and F) The levels of TNF- $\alpha$  (E) and IL-1 $\beta$  (F) proteins measured in mice brain samples (n = 3 to 5). Three slices of each sample were used to normalize each sample. Values are presented as means  $\pm$  SEM. #P < 0.05, ##P < 0.01, and ###P < 0.001 versus WT; \*P < 0.05 and \*\*P < 0.01 versus 5xFAD (A to F); one-way ANOVA with Tukey's test.

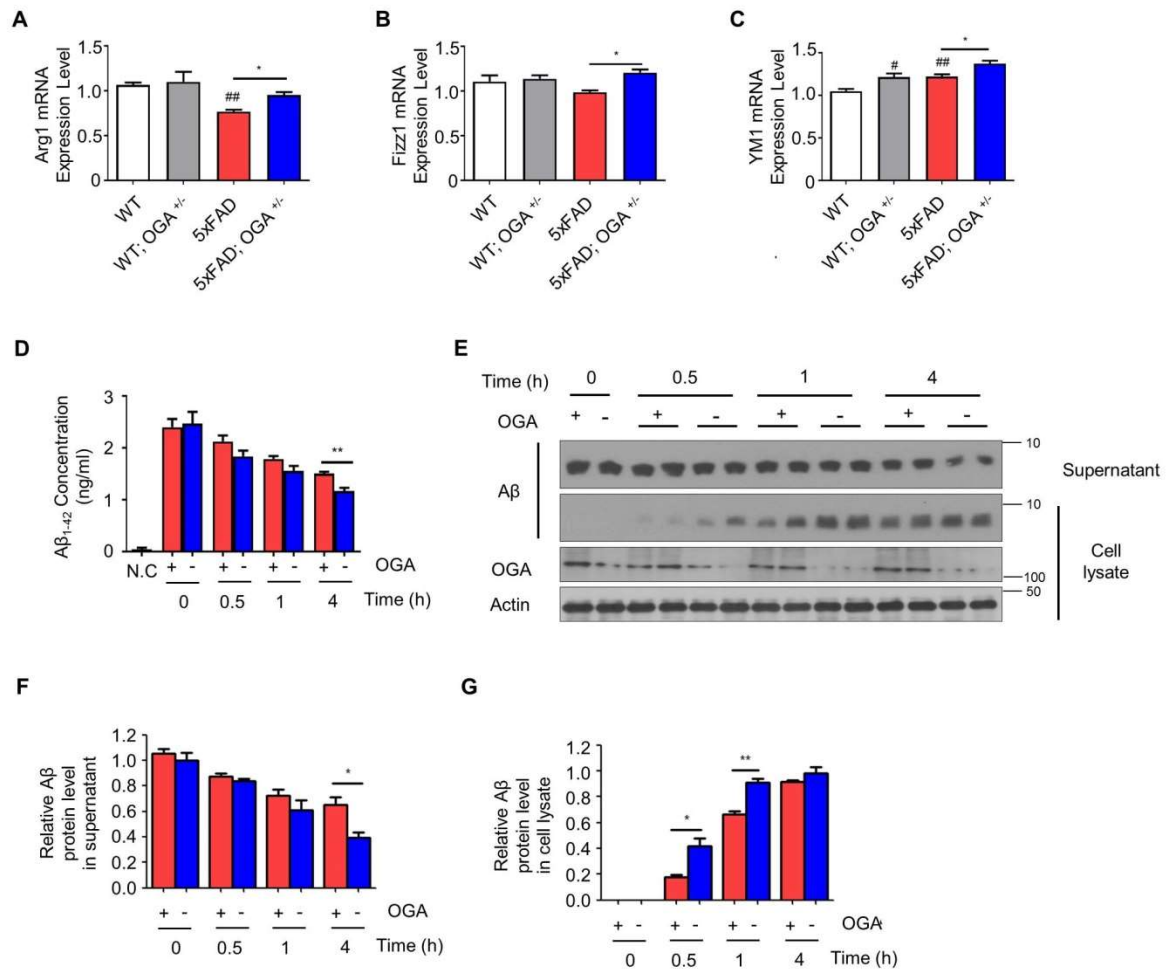

**Fig. S6. Increasing O-GlcNAcylation alters polarization of microglia and increases phagocytic activity.** (A to C) Levels of Arg 1 (A), Fizz1 (B), and YM1 (C) mRNA in mice brain samples (n = 3 to 5). (D) Levels of Aβ<sub>42</sub> remaining in the culture media with primary microglia measured by ELISA (n = 3). (E) Western blot analysis of extracellular and intracellular levels of Aβ<sub>42</sub> in primary microglia at each time point. (F and G) Quantification of Aβ proteins in supernatant (F) or cell lysate (G) in fig. S6E. Values are presented as means ± SEM. ##P < 0.01, and ###P < 0.001 versus WT; \*P < 0.05 and \*\*P < 0.01 versus 5xFAD (A to C) or WT microglia (D to G); one-way ANOVA with Tukey's test (A to C), two-tailed Student's t test (D to G).

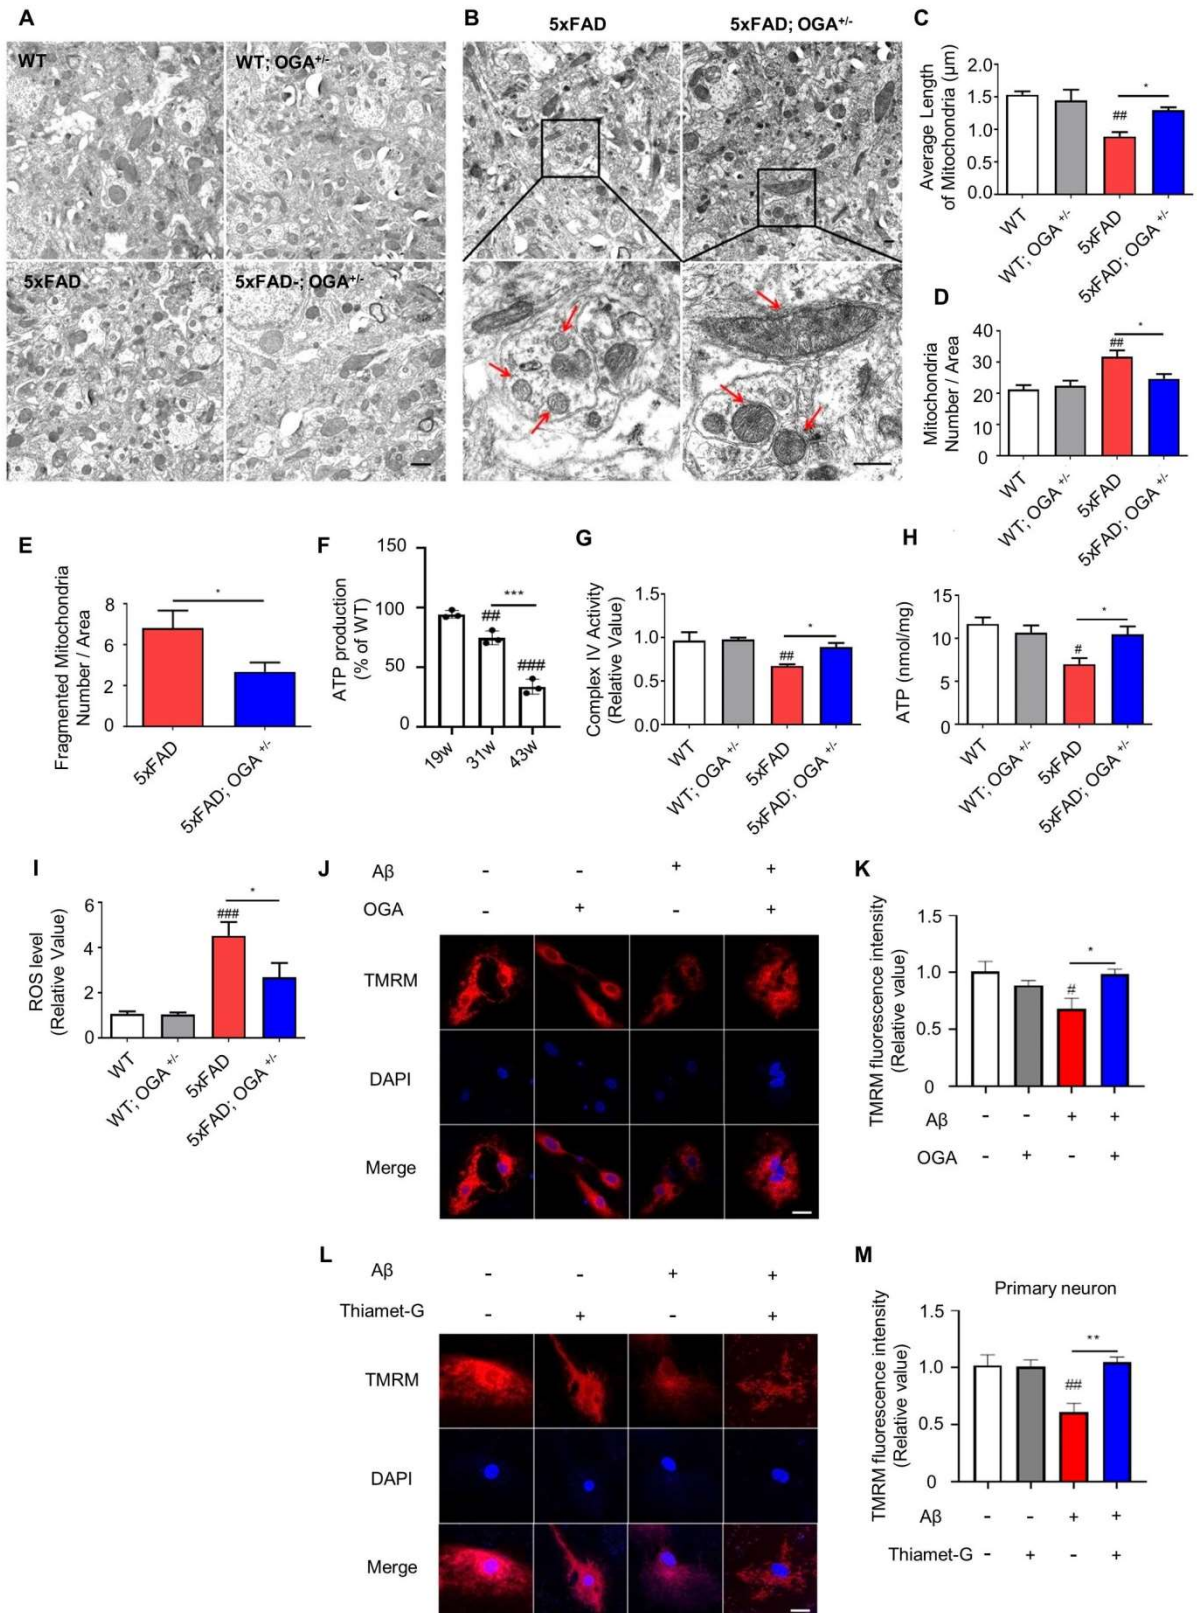

**Fig. S7. O-GlcNAcylation rejuvenates damaged mitochondria.** (A) TEM images of cortical region of mice samples (n = 4 to 7); scale bar = 1  $\mu$ m. (B) TEM images at higher magnification of 5xFAD and 5xFAD; OGA<sup>+/-</sup> mice (n = 3 to 4); scale bar = 250 nm. (C) Quantification of average length of mitochondria in fig. S7A. (D) The number of mitochondria in fig. S7A. (E) The number of fragmented mitochondria in fig. S7B. (F) ATP production in the brain tissue of 5xFAD mice (n = 3). (G) Quantification of Complex IV activity in the brain of mice samples (n = 3 to 5). (H) ATP production in mitochondria of mice samples (n = 3 to 5; 9 months of age). (I) ROS levels in mitochondria of mice samples (n = 3 to 5). (J) Images of TMRM staining in primary neurons of WT or WT;OGA<sup>+/-</sup> mice exposed to A $\beta$  (n = 3); scale bar = 20  $\mu$ m. (K) Quantification of TMRM fluorescence intensity in fig. S7J. (L) Images of TMRM staining in rat primary neurons exposed to A $\beta$  or treated with thiamet-G (n = 3); scale bar = 10  $\mu$ m. (M) Quantification of TMRM fluorescence intensity in fig. S7L. Values are presented as means  $\pm$  SEM. #P < 0.05, ##P < 0.01, and ###P < 0.001 versus WT (C to I) except for 19w (F) or control group (K and M); \*P < 0.05, \*P < 0.01, and \*\*\*P < 0.001 versus 5xFAD (C to I) except for 31 w (F) or A $\beta$  exposed group (K and M); one-way ANOVA with Tukey's test except for two-tailed Student's t test (E).

**Table S1. Clinical data of AD patients and non-demented control subjects**

| Patients     | Age (years) | Gender | PMI (h)   | Neuritic Plaques | Cause of death                        | Braak stage |
|--------------|-------------|--------|-----------|------------------|---------------------------------------|-------------|
| AD patients  |             |        |           |                  |                                       |             |
| 1            | 83          | Male   | 4.00      | 24.6             | Aspiration pneumonia                  | 6           |
| 2            | 78          | Male   | 3.75      | 34.2             | Unknown                               | 6           |
| 3            | 84          | Male   | 4.5       | 34.8             | Unknown                               | 6           |
| 4            | 86          | Female | 3.25      | 19.4             | Respiratory infection                 | 6           |
| 5            | 74          | Male   | 3.00      | 27.2             | Fall                                  | 6           |
| 6            | 90          | Female | 2.6       | 30.4             | Unknown                               | 6           |
| Mean±S.D     | 82.5±5.22   |        | 3.51±0.63 | 28.43±5.40       |                                       |             |
| Non-demented |             |        |           |                  |                                       |             |
| 1            | 81          | Male   | 2.0       | 13.4             | Pulmonary embolism                    | 2           |
| 2            | 76          | Female | 2.0       | 0                | Chronic obstructive pulmonary disease | 1           |
| 3            | 85          | Male   | 2.0       | 5.6              | Unknown                               | 3           |
| 4            | 74          | Male   | 4.0       | 0                | Congestive heart failure              | 1           |
| 5            | 86          | Female | 2.25      | 7.6              | Unknown                               | 2           |
| 6            | 86          | Female | 3.75      | 7.8              | Cardiovascular disease                | 1           |
| Mean±S.D     | 81.33±4.82  |        | 2.67±0.86 | 5.73±4.70        |                                       |             |

**Table S2. Antibody information**

| Name             | Company        | Cat. Number | Host | Reactivity | Molecular weight            | Antibody concentration |          |
|------------------|----------------|-------------|------|------------|-----------------------------|------------------------|----------|
|                  |                |             |      |            |                             | W.B                    | Staining |
| A $\beta$        | Abcam          | Ab39377     | R    | H, M       |                             |                        | 1:1000   |
| A $\beta$ (6e10) | Biologend      | 803004      | M    | H          | 10~                         | 1: 1000                |          |
| APP              | Biologend      | 802801      | M    | H, M, R    | 100~150                     | 1: 1000                |          |
| APP-CTF          | Biologend      | 802801      | M    | H, M, R    | 100~150(Full)<br>10~20(CTF) | 1: 1000                |          |
| BACE1            | Cell Signaling | 5606        | R    | H, M, R    | 70                          | 1:1000                 |          |
| GFAP             | Millipore      | MAB360      | M    | H, M, R    | 51                          | 1: 1000                | 1:500    |
| Iba-1            | Genetex        | GTX632426   | M    | H, M, R    | 17                          | 1: 1000                |          |
| Iba-1            | Wako           | 019-19741   | R    | H, M, R    |                             |                        | 1:1000   |
| MLKL             | Millipore      | CS214789    | R    | H          | 50~60                       | 1: 1000                |          |
| MLKL             | Millipore      | MABC604     | Rat  | M          | 52                          | 1: 1000                |          |
| NeuN             | Millipore      | MAB377      | M    | H, M, R    |                             |                        | 1:1000   |
| NeuN-488         | Abcam          | Ab190194    | R    | H, M, R    |                             |                        | 1:100    |
| OGA              | Novus          | NBP1-81244  | R    | H, M, R    | 130                         | 1: 1000                |          |
| O-Glcnac         | Invitrogen     | MA1-072     | M    | H, M, R    | 40~                         | 1: 1000                | 1:250    |
| O-GlcNAc         | Cell Signaling | 9875        | M    | All        | 40~                         | 1: 1000                |          |
| OGT              | Abcam          | Ab96718     | R    | H, M, R    | 117                         | 1: 2000                |          |
| P-MLKL           | Abcam          | Ab196436    | R    | M          | 54                          | 1: 1000                | 1:100    |
| P-MLKL           | Millipore      | CS214775    | R    | H          | 50~60                       | 1: 1000                |          |

|               |                |         |   |         |       |         |       |
|---------------|----------------|---------|---|---------|-------|---------|-------|
| P-RIPK1       | Cell Signaling | 31122s  | R | M       | 80    | 1: 1000 |       |
| P-RIPK1       | Cell Signaling | 65746   | R | H       | 80    | 1: 1000 |       |
| P-RIPK3       | Cell Signaling | 57220   | R | M       | 55    | 1: 1000 |       |
| P-RIPK3       | Cell Signaling | 93654   | R | H       | 55    | 1: 1000 |       |
| PS1           | Cell Signaling | 5643    | R | H, M, R | 20~25 | 1: 1000 |       |
| RIPK1         | BD Sciences    | 610458  | M | H, M, R | 74    | 1: 1000 |       |
| RIPK3         | Abcam          | Ab56164 | R | H, M    | 54    | 1: 500  |       |
| Synaptophysin | Abcam          | Ab8049  | M | H, M, R | 38    | 1:500   | 1:100 |

**Table S3. qRT-PCR primer information**

| Primer name   | Sequence (Forward)         | Sequence (Reverse)       | Reference |
|---------------|----------------------------|--------------------------|-----------|
| TNF- $\alpha$ | CAGAGGGCCTGTACCTCATCc      | GGAAGACCCCTCCCAGATAG     | (40)      |
| Il-6          | AATTCGGTACATCCTCGACGG      | TTGGAAGGTTTCAGGTTGTTTTC  | (40)      |
| Il-1 $\beta$  | AGCTGGATGCTCTCATCAGG       | AGTTGACGGACCCCAAAG       |           |
| iNOS          | GGGCTGTCACGGAGATCA         | CCATGATGGTCACATTCTGC     |           |
| Arg1          | TCACCTGAGCTTTGATGTCCG      | CTGAAAGGAGCCCTGTCTTG     | (51)      |
| Fizz1         | CTGATGAGACCATAGAGATTATCGTG | GCACAGGCAGTTGCAAGTATCTCC | (52)      |
| YM1           | CGAGGTAATGAGTGGGTTGG       | CACGGCACCTCCTAAATTGT     | (51)      |
| GAPDH         | TGTCCGTCGTGGATCTGAC        | CGTGCTTCACCACCTTCTTG     |           |

## REFERENCES AND NOTES

1. J. Wang, B. J. Gu, C. L. Masters, Y.-J. Wang, A systemic view of Alzheimer disease—Insights from amyloid- $\beta$  metabolism beyond the brain. *Nat. Rev. Neurol.* **13**, 612–623 (2017).
2. H. Lee, D. Kim, W. Lee, H. Y. Kim, Y. Kim, Preventive approach for overcoming dementia. *Arch. Pharm. Res.* **42**, 647–657 (2019).
3. G. Livingston, A. Sommerlad, V. Orgeta, S. G. Costafreda, J. Huntley, D. Ames, C. Ballard, S. Banerjee, A. Burns, J. Cohen-Mansfield, C. Cooper, N. Fox, L. N. Gitlin, R. Howard, H. C. Kales, E. B. Larson, K. Ritchie, K. Rockwood, E. L. Sampson, Q. Samus, L. S. Schneider, G. Selbæk, L. Teri, N. Mukadam, Dementia prevention, intervention, and care. *Lancet* **390**, 2673–2734 (2017).
4. Q. Li, B. A. Barres, Microglia and macrophages in brain homeostasis and disease. *Nat. Rev. Immunol.* **18**, 225–242 (2018).
5. A. Caccamo, C. Branca, I. S. Piras, E. Ferreira, M. J. Huentelman, W. S. Liang, B. Readhead, J. T. Dudley, E. E. Spangenberg, K. N. Green, R. Belfiore, W. Winslow, S. Oddo, Necroptosis activation in Alzheimer’s disease. *Nat. Neurosci.* **20**, 1236–1246 (2017).
6. L. Galluzzi, G. Kroemer, Necroptosis: A specialized pathway of programmed necrosis. *Cell* **135**, 1161–1163 (2008).
7. D. C. Rubinsztein, RIPK1 promotes inflammation and  $\beta$ -amyloid accumulation in Alzheimer’s disease. *Proc. Natl. Acad. Sci. U.S.A.* **114**, 10813–10814 (2017).
8. J. Yuan, P. Amin, D. Ofengeim, Necroptosis and RIPK1-mediated neuroinflammation in CNS diseases. *Nat. Rev. Neurosci.* **20**, 19–33 (2019).
9. S.-H. Yang, D. K. Lee, J. Shin, S. Lee, S. Baek, J. Kim, H. Jung, J.-M. Hah, Y. Kim, Nec-1 alleviates cognitive impairment with reduction of A $\beta$  and tau abnormalities in APP/PS1 mice. *EMBO Mol. Med.* **9**, 61–77 (2016).
10. Y. Ito, D. Ofengeim, A. Najafov, S. Das, S. Saberi, Y. Li, J. Hitomi, H. Zhu, H. Chen, L. Mayo, J. Geng, P. Amin, J. P. DeWitt, A. K. Mookhtiar, M. Florez, A. T. Ouchida, J.-b. Fan, M. Pasparakis, M.

- A. Kelliher, J. Ravits, J. Yuan, RIPK1 mediates axonal degeneration by promoting inflammation and necroptosis in ALS. *Science* **353**, 603–608 (2016).
11. D. Ofengeim, Y. Ito, A. Najafov, Y. Zhang, B. Shan, J. P. DeWitt, J. Ye, X. Zhang, A. Chang, H. Vakifahmetoglu-Norberg, J. Geng, B. Py, W. Zhou, P. Amin, J. Berlink Lima, C. Qi, Q. Yu, B. Trapp, J. Yuan, Activation of necroptosis in multiple sclerosis. *Cell Rep.* **10**, 1836–1849 (2015).
  12. A. Iannielli, S. Bido, L. Folladori, A. Segnali, C. Cancellieri, A. Maresca, L. Massimino, A. Rubio, G. Morabito, L. Caporali, F. Tagliavini, O. Musumeci, G. Gregato, E. Bezar, V. Carelli, V. Tiranti, V. Broccoli, Pharmacological inhibition of necroptosis protects from dopaminergic neuronal cell death in Parkinson's disease models. *Cell Rep.* **22**, 2066–2079 (2018).
  13. J. Park, M. K. P. Lai, T. V. Arumugam, D.-G. Jo, O-GlcNAcylation as a therapeutic target for Alzheimer's disease. *Neuromol. Med.* **22**, 171–193 (2020).
  14. Y. E. Lewis, A. Galesic, P. M. Levine, C. A. De Leon, N. Lamiri, C. K. Brennan, M. R. Pratt, O-GlcNAcylation of  $\alpha$ -synuclein at serine 87 reduces aggregation without affecting membrane binding. *ACS Chem. Biol.* **12**, 1020–1027 (2017).
  15. N. B. Hastings, X. Wang, L. Song, B. D. Butts, D. Grotz, R. Hargreaves, J. F. Hess, K.-L. K. Hong, C. R.-R. Huang, L. Hyde, M. Lavery, J. Lee, D. Levitan, S. X. Lu, M. Maguire, V. Mahadomrongkul, E. J. McEachern, X. Ouyang, T. W. Rosahl, H. Selnick, M. Stanton, G. Terracina, D. J. Vocadlo, G. Wang, J. L. Duffy, E. M. Parker, L. Zhang, Inhibition of O-GlcNAcase leads to elevation of O-GlcNAc tau and reduction of taupathy and cerebrospinal fluid tau in rTg4510 mice. *Mol. Neurodegener.* **12**, 39 (2017).
  16. S. A. Yuzwa, X. Shan, M. S. Macauley, T. Clark, Y. Skorobogatko, K. Vosseller, D. J. Vocadlo, Increasing O-GlcNAc slows neurodegeneration and stabilizes tau against aggregation. *Nat. Chem. Biol.* **8**, 393–399 (2012).
  17. Y. Gao, L. Wells, F. I. Comer, G. J. Parker, G. W. Hart, Dynamic O-glycosylation of nuclear and cytosolic proteins: Cloning and characterization of a neutral, cytosolic beta-N-acetylglucosaminidase from human brain. *J. Biol. Chem.* **276**, 9838–9845 (2001).



18. Y. R. Yang, M. Song, H. Lee, Y. Jeon, E.-J. Choi, H.-J. Jang, H. Y. Moon, H.-Y. Byun, E.-K. Kim, D. H. Kim, M. N. Lee, A. Koh, J. Ghim, J. H. Choi, W. Lee-Kwon, K. T. Kim, S. H. Ryu, P.-G. Suh, O-GlcNAcase is essential for embryonic development and maintenance of genomic stability. *Aging Cell* **11**, 439–448 (2012).
19. T. S. Pinho, S. C. Correia, G. Perry, A. F. Ambrósio, P. I. Moreira, Diminished O-GlcNAcylation in Alzheimer's disease is strongly correlated with mitochondrial anomalies. *Biochim. Biophys. Acta Mol. Basis Dis.* **1865**, 2048–2059 (2019).
20. F. Liu, J. Shi, H. Tanimukai, J. Gu, J. Gu, I. Grundke-Iqbal, K. Iqbal, C.-X. Gong, Reduced O-GlcNAcylation links lower brain glucose metabolism and tau pathology in Alzheimer's disease. *Brain* **132**, 1820–1832 (2009).
21. A. C. Wang, E. H. Jensen, J. E. Rexach, H. V. Vinters, L. C. Hsieh-Wilson, Loss of O-GlcNAc glycosylation in forebrain excitatory neurons induces neurodegeneration. *Proc. Natl. Acad. Sci. U.S.A.* **113**, 15120–15125 (2016).
22. S. A. Yuzwa, X. Shan, B. A. Jones, G. Zhao, M. L. Woodward, X. Li, Y. Zhu, E. J. McEachern, M. A. Silverman, N. V. Watson, C.-X. Gong, D. J. Vocadlo, Pharmacological inhibition of O-GlcNAcase (OGA) prevents cognitive decline and amyloid plaque formation in bigenic tau/APP mutant mice. *Mol. Neurodegener.* **9**, 42 (2014).
23. E. P. Tan, S. R. McGreal, S. Graw, R. Tessman, S. J. Koppel, P. Dhakal, Z. Zhang, M. Machacek, N. E. Zachara, D. C. Koestler, K. R. Peterson, J. P. Thyfault, R. H. Swerdlow, P. Krishnamurthy, L. DiTacchio, U. Apte, C. Slawson, Sustained O-GlcNAcylation reprograms mitochondrial function to regulate energy metabolism. *J. Biol. Chem.* **292**, 14940–14962 (2017).
24. M.-Y. Cha, H. J. Cho, C. Kim, Y. O. Jung, M. J. Kang, M. E. Murray, H. S. Hong, Y.-J. Choi, H. Choi, D. K. Kim, H. Choi, J. Kim, D. W. Dickson, H. K. Song, J. W. Cho, E. C. Yi, J. Kim, S. M. Jin, I. Mook-Jung, Mitochondrial ATP synthase activity is impaired by suppressed O-GlcNAcylation in Alzheimer's disease. *Hum. Mol. Genet.* **24**, 6492–6504 (2015).

25. J. Li, T. McQuade, A. B. Siemer, J. Napetschnig, K. Moriwaki, Y.-S. Hsiao, E. Damko, D. Moquin, T. Walz, A. McDermott, F. K.-M. Chan, H. Wu, The RIP1/RIP3 necrosome forms a functional amyloid signaling complex required for programmed necrosis. *Cell* **150**, 339–350 (2012).
26. M. S. Macauley, X. Shan, S. A. Yuzwa, T. M. Gloster, D. J. Vocadlo. Elevation of global *O*-GlcNAc in rodents using a selective *O*-GlcNAcase inhibitor does not cause insulin resistance or perturb glucohomeostasis. *Chem. Biol.* **17**, 949–958 (2010).
27. C. Keembiyehetty, D. C. Love, K. R. Harwood, O. Gavrilova, M. E. Comly, J. A. Hanover. Conditional knock-out reveals a requirement for *O*-linked N-acetylglucosaminase (*O*-GlcNAcase) in metabolic homeostasis. *J. Biol. Chem.* **290**, 7097–7113 (2015).
28. H. Oakley, S. L. Cole, S. Logan, E. Maus, P. Shao, J. Craft, A. Guillozet-Bongaarts, M. Ohno, J. Disterhoft, L. V. Eldik, R. Berry, R. Vassar. Intraneuronal  $\beta$ -amyloid aggregates, neurodegeneration, and neuron loss in transgenic mice with five familial Alzheimer's disease mutations: Potential factors in amyloid plaque formation. *J. Neurosci.* **26**, 10129–10140 (2006).
29. O. Butovsky, H. L. Weiner, Microglial signatures and their role in health and disease. *Nat. Rev. Neurosci.* **19**, 622–635 (2018).
30. S. H. Baek, S. J. Park, J. I. Jeong, S. H. Kim, J. Han, J. W. Kyung, S.-H. Baik, Y. Choi, B. Y. Choi, J. S. Park, G. Bahn, J. H. Shin, D. S. Jo, J.-Y. Lee, C.-G. Jang, T. V. Arumugam, J. Kim, J.-W. Han, J.-Y. Koh, D.-Y. Cho, D.-G. Jo. Inhibition of Drp1 ameliorates synaptic depression, A $\beta$  deposition, and cognitive impairment in an Alzheimer's disease model. *J. Neurosci.* **37**, 5099–5110 (2017).
31. L. S. Griffith, B. Schmitz, *O*-linked *N*-acetylglucosamine is upregulated in Alzheimer brains. *Biochem. Biophys. Res. Commun.* **213**, 424–431 (1995).
32. S. Förster, A. S. Welleford, J. C. Triplett, R. Sultana, B. Schmitz, D. A. Butterfield, Increased *O*-GlcNAc levels correlate with decreased *O*-GlcNAcase levels in Alzheimer disease brain. *Biochim. Biophys. Acta* **1842**, 1333–1339 (2014).
33. X. Li, W. Gong, H. Wang, T. Li, K. S. Attri, R. E. Lewis, A. C. Kalil, F. Bhinderwala, R. Powers, G. Yin, L. E. Herring, J. M. Asara, Y. L. Lei, X. Yang, D. A. Rodriguez, M. Yang, D. R. Green, P. K.

- Singh, H. Wen, *O*-GlcNAc transferase suppresses inflammation and necroptosis by targeting receptor-interacting serine/threonine-protein kinase 3. *Immunity* **50**, 576–590.e6 (2019).
34. B. Zhang, M.-D. Li, R. Yin, Y. Liu, Y. Yang, K. A. Mitchell-Richards, J. H. Nam, R. Li, L. Wang, Y. Iwakiri, D. Chung, M. E. Robert, B. E. Ehrlich, A. M. Bennett, J. Yu, M. H. Nathanson, X. Yang, *O*-GlcNAc transferase suppresses necroptosis and liver fibrosis. *JCI Insight* **4**, 127709 (2019).
35. C. Kim, D. W. Nam, S. Y. Park, H. S. Hong, J. H. Boo, E. S. Jung, Y. Kim, J. U. Baek, K. S. Kim, J. W. Cho, I. Mook-Jung, *O*-linked  $\beta$ -*N*-acetylglucosaminidase inhibitor attenuates  $\beta$ -amyloid plaque and rescues memory impairment. *Neurobiol. Aging* **34**, 275–285 (2013).
36. K. T. Jacobsen, K. Iverfeldt, *O*-GlcNAcylation increases non-amyloidogenic processing of the amyloid- $\beta$  precursor protein (APP). *Biochem. Biophys. Res. Commun.* **404**, 882–886 (2011).
37. S. Jimenez, D. Baglietto-Vargas, C. Caballero, I. Moreno-Gonzalez, M. Torres, R. Sanchez-Varo, D. Ruano, M. Vizuete, A. Gutierrez, J. Vitorica, Inflammatory response in the hippocampus of PS1M146L/APP751SL mouse model of Alzheimer's disease: Age-dependent switch in the microglial phenotype from alternative to classic. *J. Neurosci.* **28**, 11650–11661 (2008).
38. K. Kawahara, M. Suenobu, A. Yoshida, K. Koga, A. Hyodo, H. Ohtsuka, A. Kuniyasu, N. Tamamaki, Y. Sugimoto, H. Nakayama, Intracerebral microinjection of interleukin-4/interleukin-13 reduces  $\beta$ -amyloid accumulation in the ipsilateral side and improves cognitive deficits in young amyloid precursor protein 23 mice. *Neuroscience* **207**, 243–260 (2012).
39. R.-Y. Pan, J. Ma, X.-X. Kong, X.-F. Wang, S.-S. Li, X.-L. Qi, Y.-H. Yan, J. Cheng, Q. Liu, W. Jin, C.-H. Tan, Z. Yuan, Sodium rutin ameliorates Alzheimer's disease-like pathology by enhancing microglial amyloid- $\beta$  clearance. *Sci. Adv.* **5**, eaau6328 (2019).
40. I.-H. Ryu, K.-Y. Lee, S.-I. Do, A $\beta$ -affected pathogenic induction of *S*-nitrosylation of OGT and identification of Cys-NO linkage triplet. *Biochim. Biophys. Acta* **1864**, 609–621 (2016).
41. A. Tramutola, N. Sharma, E. Barone, C. Lanzillotta, A. Castellani, F. Lavarone, F. Vincenzoni, M. Castagnola, D. A. Butterfield, S. Gaetani, T. Cassano, M. Perluigi, F. Di Domenico. Proteomic

identification of altered protein *O*-GlcNAcylation in a triple transgenic mouse model of Alzheimer's disease. *Biochim. Biophys. Acta Mol. Basis Dis.* **1864**, 3309–3321 (2018).

42. P. Sandhu, J. Lee, J. Ballard, B. Walker, J. Ellis, J. Marcus, D. Toolan, D. Dreyer, T. McAvoy, J. Duffy, M. Michener, C. Valiathan, N. Trainor, M. Savage, E. McEachern, D. Vocadlo, S. M. Smith, A. Struyk, Pharmacokinetics and pharmacodynamics to support clinical studies of MK-8719: An *O*-GlcNAcase inhibitor for progressive supranuclear palsy. *Alzheimers Dement.* **12**, P1028 (2016).
43. J. M. Ryan, A. Quattropiani, K. Abd-Elaziz, I. den Daas, M. Schneider, S. Ousson, M. Neny, A. Sand, J. Hantson, B. Permanne, C. Wiessner, D. Beher. O1-12-05: Phase 1 study in healthy volunteers of the *O*-GlcNAcase inhibitor ASN120290 as a novel therapy for progressive supranuclear palsy and related tauopathies. *Alzheimers Dement.* **14**, P251 (2018).
44. B. T. Hyman, J. Q. Trojanowski, Consensus recommendations for the post-mortem diagnosis of Alzheimer disease from the National Institute on Aging and the Reagan Institute Working Group on diagnostic criteria for the neuropathological assessment of Alzheimer disease. *J. Neuropathol. Exp. Neurol.* **56**, 1095–1097 (1997).
45. G. Bahn, J.-S. Park, U. J. Yun, Y. J. Lee, Y. Choi, J. S. Park, S. H. Baek, B. Y. Choi, Y. S. Cho, H. K. Kim, J. Han, J. H. Sul, S.-H. Baik, J. Lim, N. Wakabayashi, S. H. Bae, J.-W. Han, T. V. Arumugam, M. P. Mattson, D.-G. Jo, NRF2/ARE pathway negatively regulates BACE1 expression and ameliorates cognitive deficits in mouse Alzheimer's models. *Proc. Natl. Acad. Sci. U.S.A.* **116**, 12516–12523 (2019).
46. A.-R. Gwon, J.-S. Park, T. V. Arumugam, Y.-K. Kwon, S. L. Chan, S.-H. Kim, S.-H. Baik, S. Yang, Y.-K. Yun, Y. Choi, S. Kim, S.-C. Tang, D.-H. Hyun, A. Cheng, C. E. Dann III, M. Bernier, J. Lee, W. R. Markesbery, M. P. Mattson, D.-G. Jo, Oxidative lipid modification of nicastrin enhances amyloidogenic  $\gamma$ -secretase activity in Alzheimer's disease. *Aging Cell* **11**, 559–568 (2012).
47. S.-H. Baik, M. Fane, J. H. Park, Y.-L. Cheng, D. Y.-W. Fann, U. J. Yun, Y. Choi, J.-S. Park, B. H. Chai, J. S. Park, S. H. Back, J. I. Jeong, Y. J. Jang, G. Bahn, J.-Y. Lee, Y.-I. Li, C. G. Sobey, T. Uchida, J. H. Park, H. T. Kim, S.-C. Tang, T. V. Arumugam, D.-G. Jo, Pin1 promotes neuronal death in stroke by stabilizing Notch intracellular domain. *Ann. Neurol.* **77**, 504–516 (2015).

48. H. Y. Kim, D. K. Lee, B.-R. Chung, H. V. Kim, Y. Kim, Intracerebroventricular injection of amyloid- $\beta$  peptides in normal mice to acutely induce Alzheimer-like cognitive deficits. *J. Vis. Exp.* **109**, e53308 (2016).
49. J. Park, M. Madan, S. Chigurupati, S. H. Baek, Y. Cho, M. R. Mughal, A. Yu, S. L. Chan, J. V. Pattisapu, M. P. Mattson, D.-G. Jo, Neuronal Aquaporin 1 inhibits amyloidogenesis by suppressing the interaction between beta-secretase and amyloid precursor protein. *J. Gerontol. A Biol. Sci. Med. Sci.*, glaa068 (2020).
50. L. Zhang, F. Ren, J. Li, X. Ma, P. Wang. A modified coupled enzyme method for *O*-linked GlcNAc transferase activity assay. *Biol. Proced. Online* **11**, 170–183 (2009).
51. Y. He, X. Ma, D. Li, J. Hao Thiamet G mediates neuroprotection in experimental stroke by modulating microglia/macrophage polarization and inhibiting NF- $\kappa$ B p65 signaling. *J. Cereb. Blood Flow Metab.* **37**, 2938–2951 (2017).
52. C. Rossi, M. Cusimano, M. Zambito, A. Finardi, A. Captondo, J. M. Garcia-Manteiga, G. Comi, R. Furlan, G. Martino, L. Muzio. Interleukin 4 modulates microglia homeostasis and attenuates the early slowly progressive phase of amyotrophic lateral sclerosis. *Cell Death Dis.* **9**, 250 (2018).
